# Supplementary material for: Accurate many-body calculation of electronic and optical band gap of bulk hexagonal boron nitride
Source: Royal Society of Chemistry journal article supplement (doi:10.1039/c8cp07328g), 2019-01-01
Supplement: c8cp07328g1.pdf [file c8cp07328g1.pdf]

# Accurate Many-body Calculation of Electronic and Optical Band Gap of Bulk Hexagonal Boron Nitride

## Supplementary Information

Miroslav Kolos and František Karlický\*

*Department of Physics, Faculty of Science, University of Ostrava, 30. dubna 22, 701 03 Ostrava, Czech Republic*

|                                                                                  |      |
|----------------------------------------------------------------------------------|------|
| Various GGA DFT functionals used for $G_0W_0$ +BSE calculations (Table S1) ..... | p. 1 |
| Contributions to excitonic wave function (Figure S1) .....                       | p. 2 |
| Scissor corrected DFT (PBE+ $\Delta$ ) and $G_0W_0$ spectra (Figure S2) .....    | p. 3 |
| Spectra from time-dependent DFT (Figure S3) .....                                | p. 3 |

TABLE S1. Comparison of calculated direct gap (DFT and  $G_0W_0$ @DFT) and optical gap (BSE+ $G_0W_0$ @DFT) values of h-BN (AA') using various one-particle theories. Binding energy of the first exciton,  $E_b^{\text{exc}} = E_{\text{gap},G_0W_0}^{\text{dir}} - E_{\text{gap},BSE}^{\text{opt}}$  is added. Almost no differences in various quasiparticle gaps and in various optical gaps based on different DFT orbitals were observed, just input DFT gaps differ.

| DFT    | $E_{\text{gap},DFT}^{\text{dir}}$ | $E_{\text{gap},G_0W_0}^{\text{dir}}$ | $E_{\text{gap},BSE}^{\text{opt}}$ | $E_b^{\text{exc}}$ |
|--------|-----------------------------------|--------------------------------------|-----------------------------------|--------------------|
| PBE    | 4.660                             | 6.533                                | 5.714                             | 0.819              |
| PBEsol | 4.575                             | 6.527                                | 5.731                             | 0.796              |
| revPBE | 4.728                             | 6.588                                | 5.715                             | 0.873              |

\* frantisek.karlicky@osu.cz

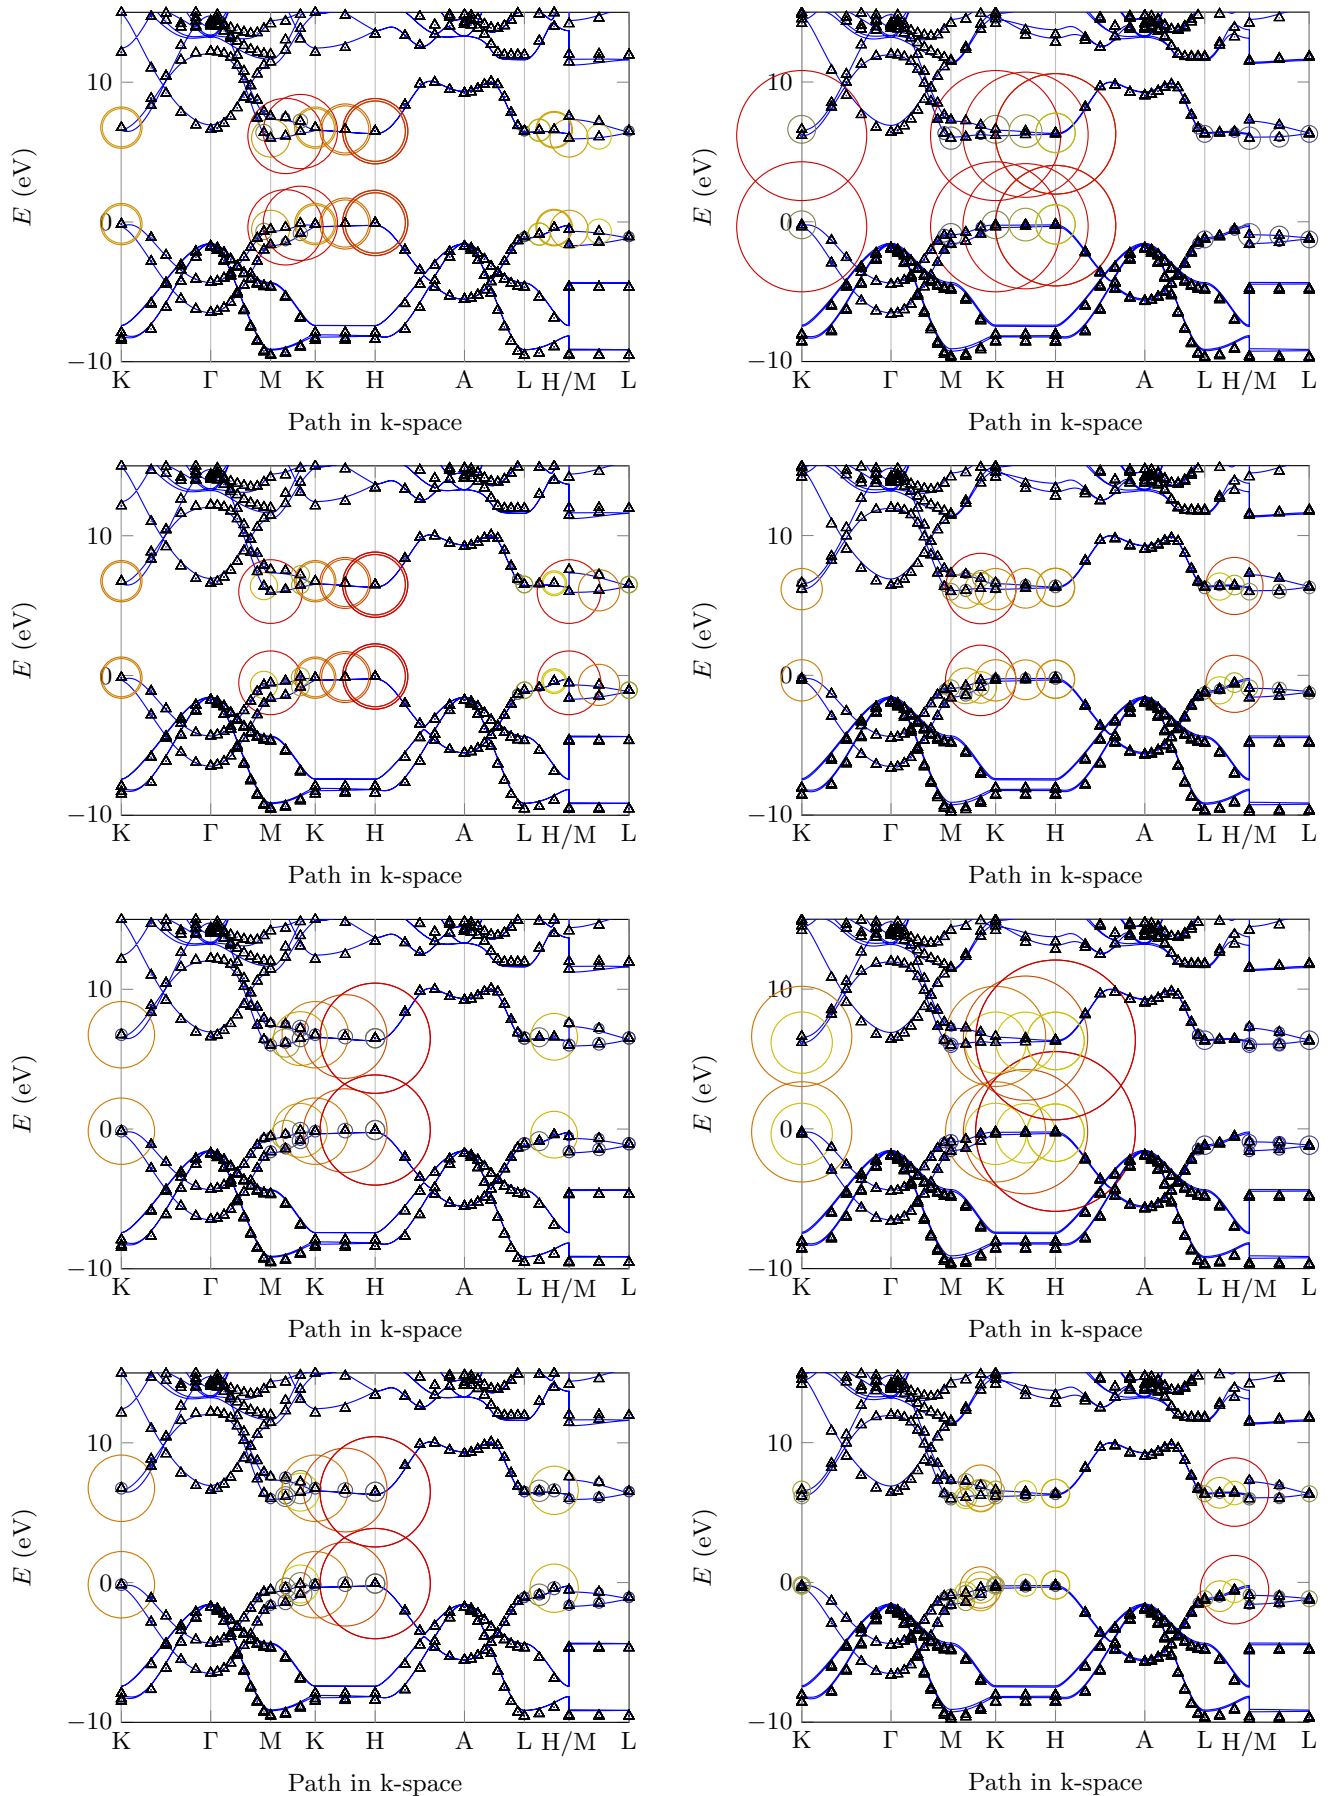

FIG. S1. Comparison of important regions in the Brillouin zone of h-BN using  $A^S_{vck}$  coefficients (see also Eq. (1) in the main text) for first four excitations  $S = 1$  (top), 2, 3, 4 (bottom). The AA' (left) and AB (right) stacking structures of h-BN are considered and  $|A^S_{vck}|$  (represented by radius of coloured circles; red = maximum, yellow = middle, grey = minimum) are depicted together with  $G_0W_0$  band structure (black triangles) and PBE+ $\Delta$  bands (blue lines) as a fat band structure [1].

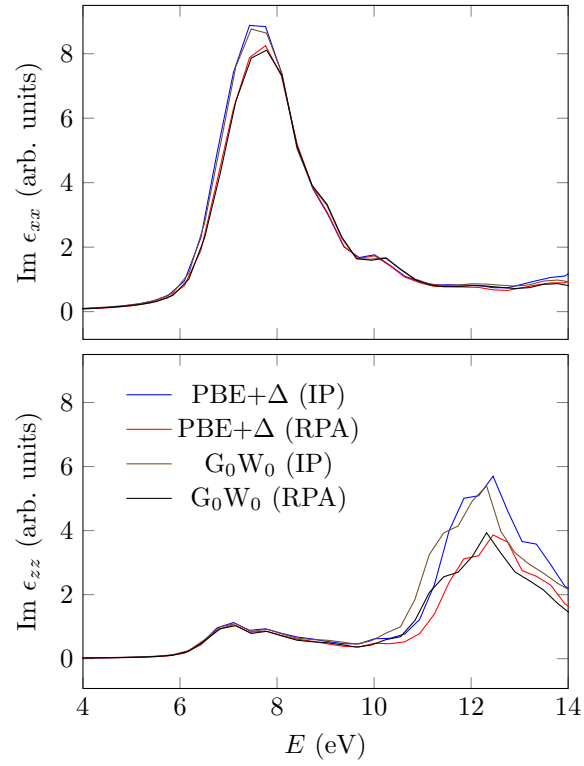

FIG. S2. Comparison of h-BN(AA') absorption spectra (imaginary part of dielectric function  $\epsilon$ ) obtained from interband transitions in scissor corrected DFT (PBE+ $\Delta$ ) band structure and  $G_0W_0$  band structure. Calculations with independent particle (IP) approach and with the inclusion of local field effects at random phase approximation (RPA) level are considered.

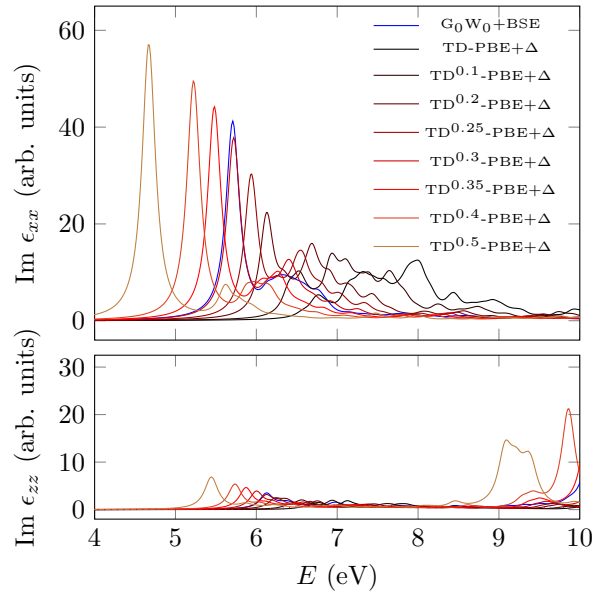

FIG. S3. Optical absorption spectra (imaginary part of dielectric function  $\epsilon$ ) of h-BN (AA') using time-dependent (TD) DFT and the reference  $G_0W_0$ +BSE curve (blue line). The electron-hole ladder diagrams in present TD-DFT calculations are approximated by the exact exchange (EEX) and different EEX/GGA ratio is evaluated (and labeled by the EEX part as  $TD^{EEX}$ -PBE+ $\Delta$ ). We achieve surprisingly good approximation with EEX/GGA ratio of 0.3/0.7.

- 
- [1] M. Bokdam, T. Sander, A. Stroppa, S. Picozzi, D. D. Sarma, C. Franchini, and G. Kresse, *Sci. Rep.* **6**, 28618 (2016).
